# Supplementary material
Source: MDPI journal article supplement (https://www.mdpi.com/2073-4344/12/5/509)
Supplement: s1 [file s1]

# Synergistic effect between Ni and Ce dual active centers initiated by activated fullerene soot for electro-Fenton degradation of tetracycline

Chi Li <sup>1</sup>, Yongfu Lian <sup>1,\*</sup> and Qin Zhou <sup>1,2\*</sup>

<sup>1</sup> Key Laboratory of Functional Inorganic Material Chemistry, Ministry of Education, School of Chemistry and Materials Science, Heilongjiang University, Harbin 150080, China;

<sup>2</sup> Modern Agriculture and the Ecological Environment Academy, Heilongjiang University, Harbin 150080, China

\* Correspondence: chyflian@hlju.edu.cn (Y.L.); zhouqin@hlju.edu.cn (Q.Z.)

## Calculation Methods

First-principles calculations were performed in the CASTEP package. The exchange-correlation energies were calculated according to the Perdew-Wang 91 (PW91) within the General Gradient Approximation (GGA) framework with the ultrasoft pseudopotentials [43], and Ce (5s, 5p, 6s, 5d, 4f), Ni (3s, 3p, 4s, 3d), O (2s, 2p), and C (2s, 2p) shells were treated as valence orbitals, while the remaining electrons were kept frozen as core states [44].

The DFT-D2 method with the Grimme Van der Waal's force correction was employed to accurately describe the long-range electrostatic interactions and the Coulomb interaction correction was also taken into account with LDA+U method to describe the electronic properties of cerium 4f and nickel 3d orbit [45]. The energy cutoff was 400 eV.

A (4 × 4 × 1) grid treated the integration of the Brillouin-zone, and a vacuum region (15 Å) was added above each slab to avoid the fake interaction along the Z-axis. Stable configurations were obtained by a geometry optimization, and the iterations were repeated until the forces on the atoms were less than 0.03 eV/Å and the energy change less than 1.0×10<sup>-5</sup> eV. The adsorption energy ( $E_{\text{ads}}$ ) is calculated using the following equation:

$$E_{\text{ads}} = E_{\text{surface+oxygen}} - E_{\text{surface}} - E_{\text{oxygen}}$$

Where the  $E_{\text{surface+oxygen}}$  is the total energy at oxygen adsorbed on the (111) plane,  $E_{\text{surface}}$  is the energy on the individual (111) plane, and  $E_{\text{oxygen}}$  is an oxygen molecule's energy."

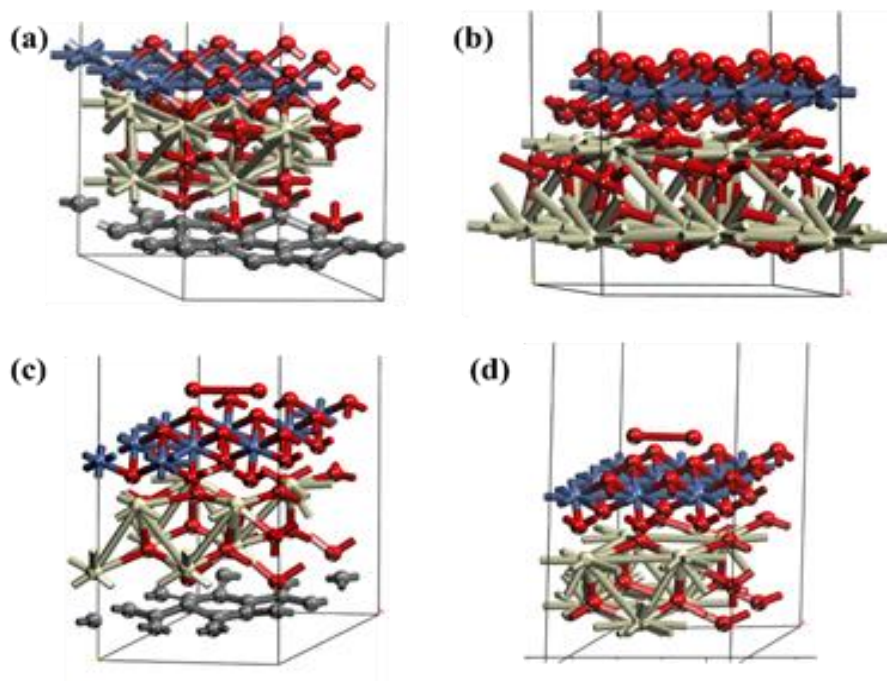

The HRTEM images displayed in Figure 3(e, f) and the XRD patterns shown in Figure 1 (a, b) prove the exposure of the (111) planes of  $\text{CeO}_2$  and  $\text{NiO}$ . And the FT-IR spectrum demonstrated in Figure 1(e) evidences the formation of  $\text{Ce-O-C}$  bond. Thus, we constructed the above figure optimized ball-and-stick models before (a, b) and after (c, d)  $\text{O}_2$  adsorption on  $(\text{NiO-CeO}_2)\text{-AFS}$  (a, c) and  $\text{NiO-CeO}_2$  (b, d), in which the yellow, red, blue and gray balls stand for the cerium, oxygen, nickel and carbon atoms, respectively. The (111) plane of  $\text{CeO}_2$  was set face to face with the (111) plane of  $\text{NiO}$ , and only the  $\text{O}_2$  adsorption on the (111) plane of  $\text{NiO}$  was comparatively studied with (c) and without (d) the existence of AFS.

**Table S1.** The specific surface areas and pore volumes of materials

|                                   | $S_{\text{BET}}$<br>( $\text{m}^2/\text{g}$ ) | $S_{\text{micro}}$<br>( $\text{m}^2/\text{g}$ ) | $V_{\text{micro}}$<br>( $\text{cm}^3/\text{g}$ ) | $V_{\text{meso}}$<br>( $\text{cm}^3/\text{g}$ ) |
|-----------------------------------|-----------------------------------------------|-------------------------------------------------|--------------------------------------------------|-------------------------------------------------|
| 0.4NiO-CeO <sub>2</sub>           | 80.2                                          | 19.7                                            | 0.01                                             | 0.01                                            |
| FS                                | 170.0                                         | 65.8                                            | 0.1                                              | 0.1                                             |
| 0.4(0.4NiO-CeO <sub>2</sub> )/FS  | 260.1                                         | 100.2                                           | 0.11                                             | 0.1                                             |
| AFS                               | 1008.3                                        | 652.3                                           | 0.41                                             | 0.30                                            |
| 0.4(0.4NiO-CeO <sub>2</sub> )/AFS | 1475.5                                        | 959.2                                           | 0.45                                             | 0.33                                            |

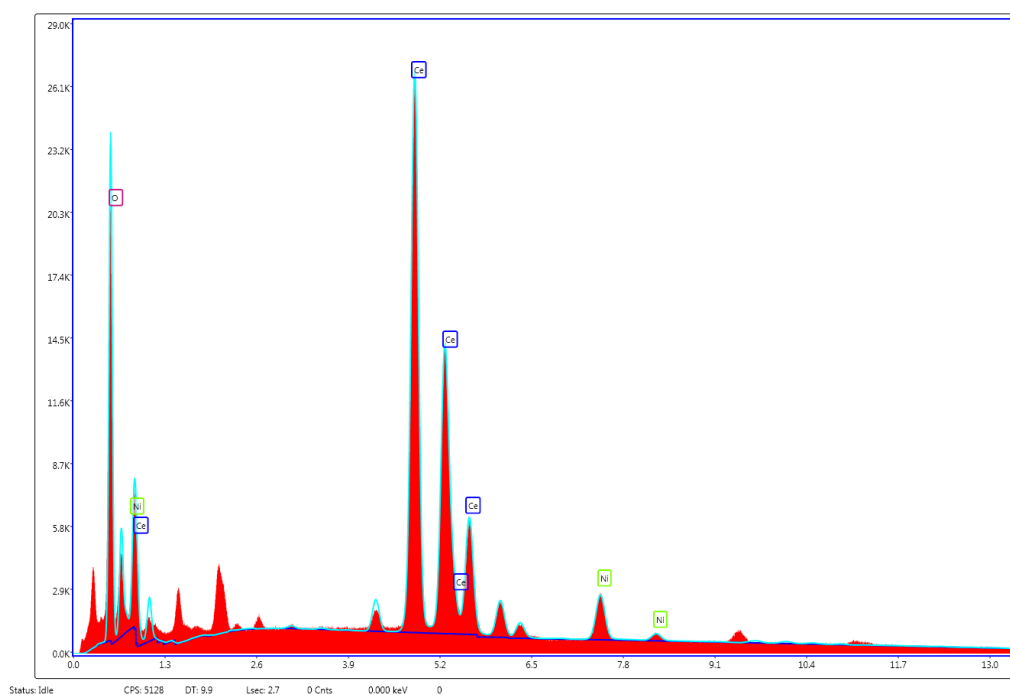

**Figure S1.** The EDS spectrum of 0.4NiO-CeO<sub>2</sub>

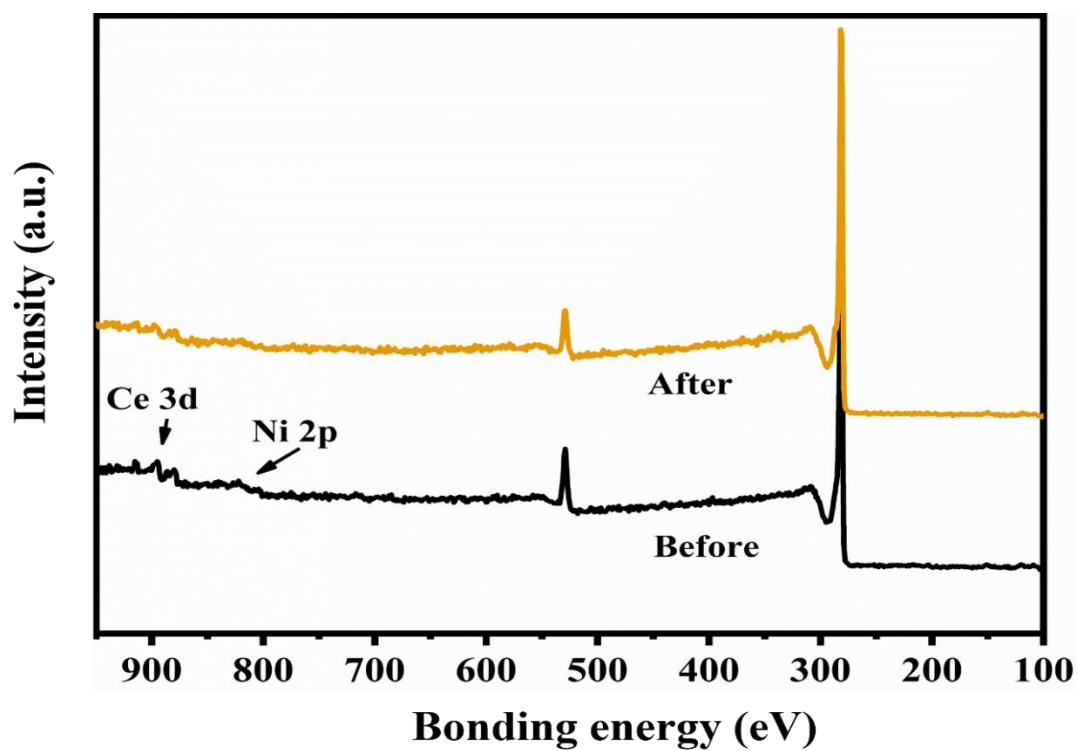

**Figure S2.** The survey spectra of 0.4(0.4NiO-CeO<sub>2</sub>)-AFS before and after catalytic reaction

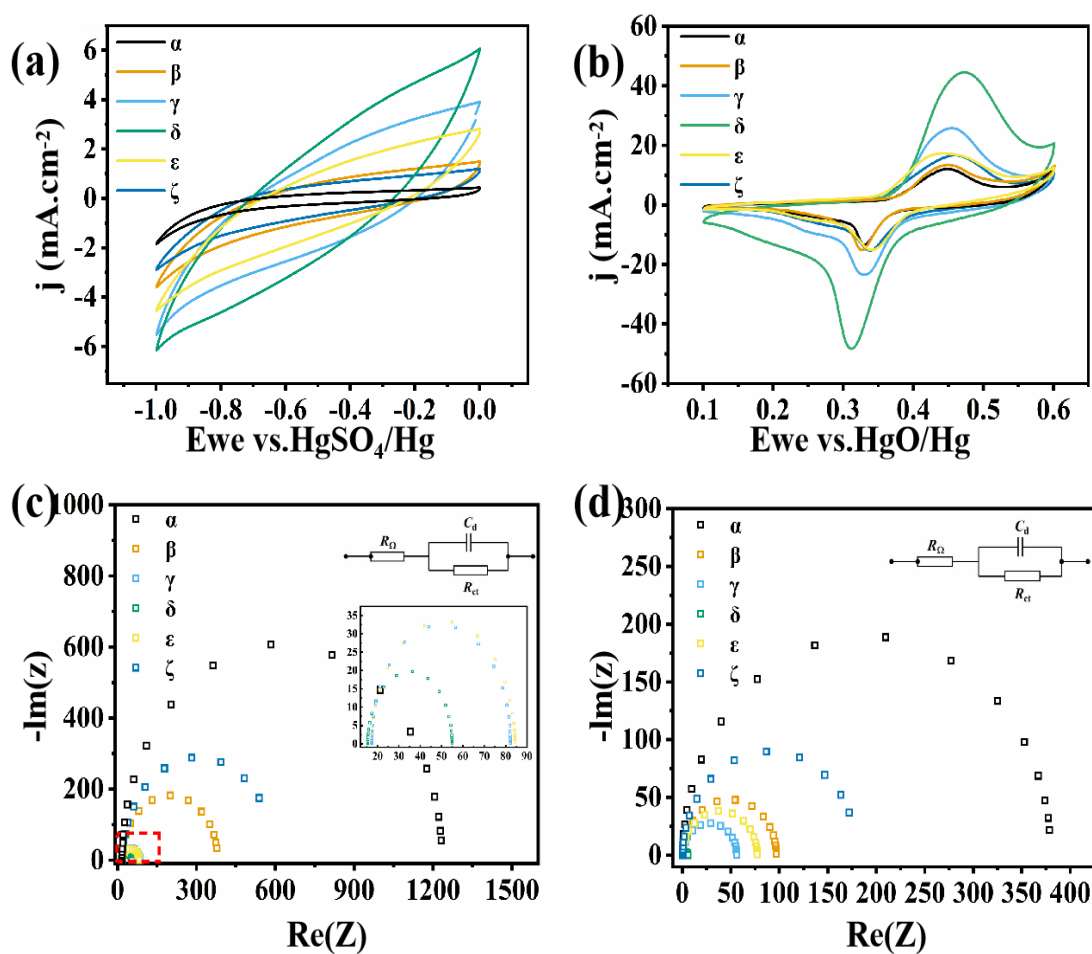

**Figure S3.** The (a) CV and (c) EIS curves in 1 mol/L  $\text{H}_2\text{SO}_4$  solution and (b) CV and (d) EIS curves in 6 mol/L KOH solution for 0.4(yNiO-CeO<sub>2</sub>)-AFS, in which  $\alpha - \zeta$  stand for the y values of 0.1, 0.2, 0.3, 0.4, 0.5 and 0.6 in 0.4(yNiO-CeO<sub>2</sub>)-AFS, respectively.

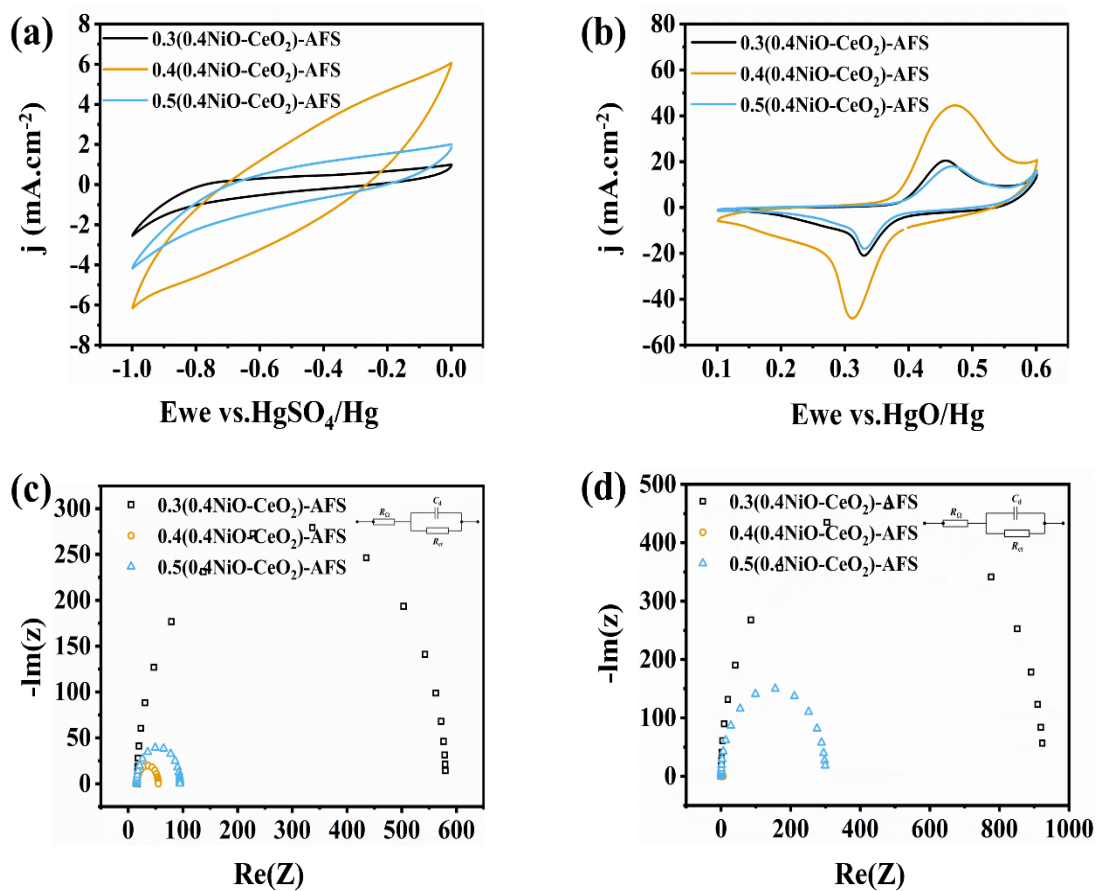

**Figure S4.** The (a) CV and (c) EIS curves in 1 mol/L  $\text{H}_2\text{SO}_4$  solution and (b) CV and (d) EIS curves in 6 mol/L KOH solution for  $x(0.4\text{NiO-CeO}_2)\text{-AFS}$  ( $x = 0.3, 0.4$  and  $0.5$ ).

**Table S2.** The performance parameters of related electro-Fenton catalysts

| Materials                                | Initial concentration ( $\text{mg}\cdot\text{L}^{-1}$ ) | Reaction time (min) | Current density ( $\text{mA}/\text{cm}^2$ ) | Degradation efficiency (%) | Mineralization rate TOC/h ( $\%/h$ ) | Aeration condition ( $\text{L}/\text{min}$ ) | References |
|------------------------------------------|---------------------------------------------------------|---------------------|---------------------------------------------|----------------------------|--------------------------------------|----------------------------------------------|------------|
| Bi-Sn-Sb/ $\gamma\text{-Al}_2\text{O}_3$ | 20                                                      | 180                 | 100                                         | 86.6                       | —                                    | 0.3                                          | [46]       |
| Ti/ $\text{RuO}_2/\text{IrO}_2$          | 100                                                     | 120                 | 200                                         | 80                         | —                                    | —                                            | [47]       |
| ZIF-8/ACF                                | 50                                                      | 20                  | 32                                          | 95                         | 15.5/6                               | 0.6                                          | [48]       |
| Cu-Fe/ $\text{Fe}_2\text{O}_3$           | 20                                                      | 120                 | 40                                          | 90                         | 85/8                                 | 0.1                                          | [49]       |
| Cu-Fe/Biochar                            | 40                                                      | 360                 | —                                           | 92                         | —                                    | —                                            | [50]       |
| FPE                                      | 50                                                      | 30                  | 2000                                        | 78                         | —                                    | 0.6                                          | [51]       |
| Fe(II)/Graphite                          | 50                                                      | 100                 | —                                           | 96.1                       | —                                    | —                                            | [52]       |
| 0.4(0.4NiO-CeO <sub>2</sub> )-AFS        | 200                                                     | 200                 | 35                                          | 96                         | 92/5                                 | 0.1                                          | this work  |
